# Supplementary material for: Tandem Repeat Insertion in African Swine Fever Virus, Russia, 2012
Source: PubMed Central journal article supplement (PMC4378484; doi:10.3201/eid2104.141792), 2015-04
Supplement: 14-1792-Techapp-s1.pdf [file 14-1792-Techapp-s1.pdf]

# Tandem Repeat Insertion in African Swine Fever Virus, Russia, 2012

## Technical Appendix. Partial nucleotide alignment of African swine fever virus intergenic regions between I73R and I329L, Russia

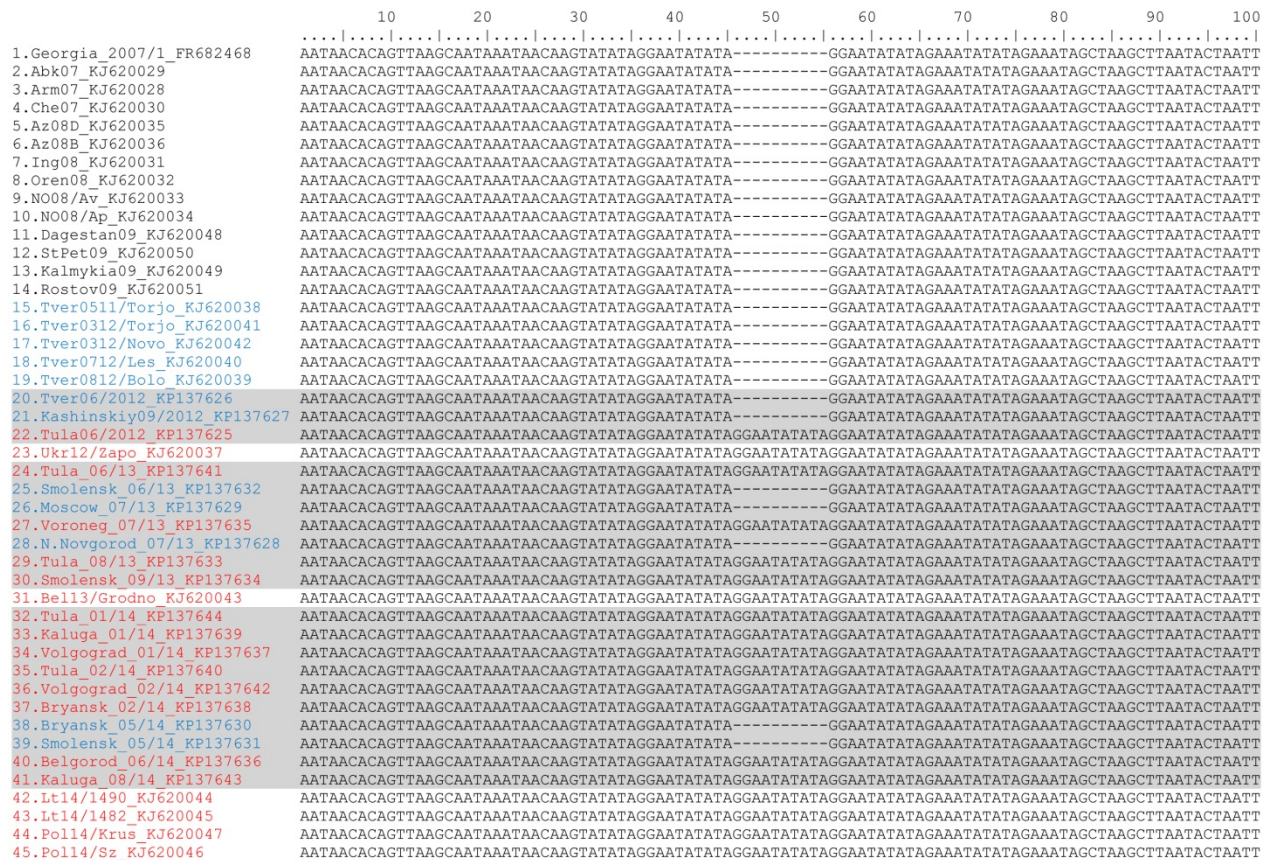

**Technical Appendix Figure.** Partial nucleotide alignment of African swine fever virus intergenic regions between I73R and I329L, Russia. -, regions without insertions. Blue indicates isolates without tandem repeat insertions, and red indicates isolates with tandem repeat insertions. Gray shading indicates isolates sequenced in this study. GenBank accession numbers are shown. Sequences in the alignment were from isolates from Poland (Pol14/Sz, Pol14/Krus), Lithuania (Lt14/1490, Lt14/1482), Belarus (Bel13/Grodno), Ukraine (Ukr12/Zap), Armenia (Arm07), Azerbaijan (Az08D, Az08B), Georgia (Georgia\_2007/1, Abk07) and Russia (Che07, Ing08, Oren08, NO08/Av, NO08/Av, Dagestan09, StPet09, Kalmykia09, Rostov09; Tver0511/Torjo, Tver0312/Novo, Tver0312/Torjo, Tver0712/Les, Tver0812/Bolo, Tver06/2012, Kashinskiy09/2012, Tula06/2012, Tula\_06/13, Smolensk\_06/13, Moscow\_07/13, Voroneg\_07/13, N.Novgorod\_07/13, Tula\_08/13, Smolensk\_09/13, Tula\_01/14, Kaluga\_01/14, Volgograd\_01/14, Tula\_02/14, Volgograd\_02/14, Bryansk\_02/14, Bryansk\_05/14, Smolensk\_05/14, Belgorod\_06/14, Kaluga\_08/14).
